# Supplementary material
Source: publisher figshare collection journal article supplement (https://acs.figshare.com/ndownloader/files/10127736)
Supplement: Supplementary file 1 [file 10127736]

## Supporting Information:

### Structure-Based Design, Synthesis and *in vivo* Antinociceptive Effects of Selective A<sub>1</sub> Adenosine Receptor Agonists<sup>#</sup>

Riccardo Petrelli,<sup>1</sup> Mirko Scortichini,<sup>1</sup> Carmela Belardo,<sup>2</sup> Serena Boccella,<sup>2</sup> Livio Luongo,<sup>2</sup> Fabio Capone,<sup>3</sup> Sonja Kachler,<sup>4</sup> Patrizia Vita,<sup>1</sup> Fabio Del Bello,<sup>1</sup> Sabatino Maione,<sup>2</sup> Antonio Lavecchia,<sup>3\*</sup> Karl-Norbert Klotz,<sup>4</sup> and Loredana Cappellacci<sup>1\*</sup>

| Contents                                                                                                                                                                                            | Page      |
|-----------------------------------------------------------------------------------------------------------------------------------------------------------------------------------------------------|-----------|
| <b>Figure S1.</b> Representative binding curves at hA <sub>1</sub> , hA <sub>2A</sub> and hA <sub>3</sub> ARs for compounds <b>6</b> , <b>7</b> , <b>10</b> , <b>12</b> , <b>16</b> and <b>17</b> . | <b>S2</b> |
| <b>Figure S2.</b> Representative functional assays at hA <sub>1</sub> AR for compounds <b>6</b> , <b>7</b> , <b>10</b> , <b>12</b> , and <b>17</b> .                                                | <b>S3</b> |
| <b>Figure S3.</b> Representative functional assays at hA <sub>2B</sub> AR for compounds <b>6</b> , and <b>7</b> .                                                                                   | <b>S4</b> |
| <b>Figure S4.</b> Representative functional assays at hA <sub>3</sub> AR for compounds <b>7</b> , <b>10</b> , <b>16</b> , and <b>17</b> .                                                           | <b>S5</b> |
| Cell culture                                                                                                                                                                                        | <b>S6</b> |
| Membrane preparation.                                                                                                                                                                               | <b>S6</b> |
| Radioligand binding and adenylyl cyclase assay.                                                                                                                                                     | <b>S6</b> |

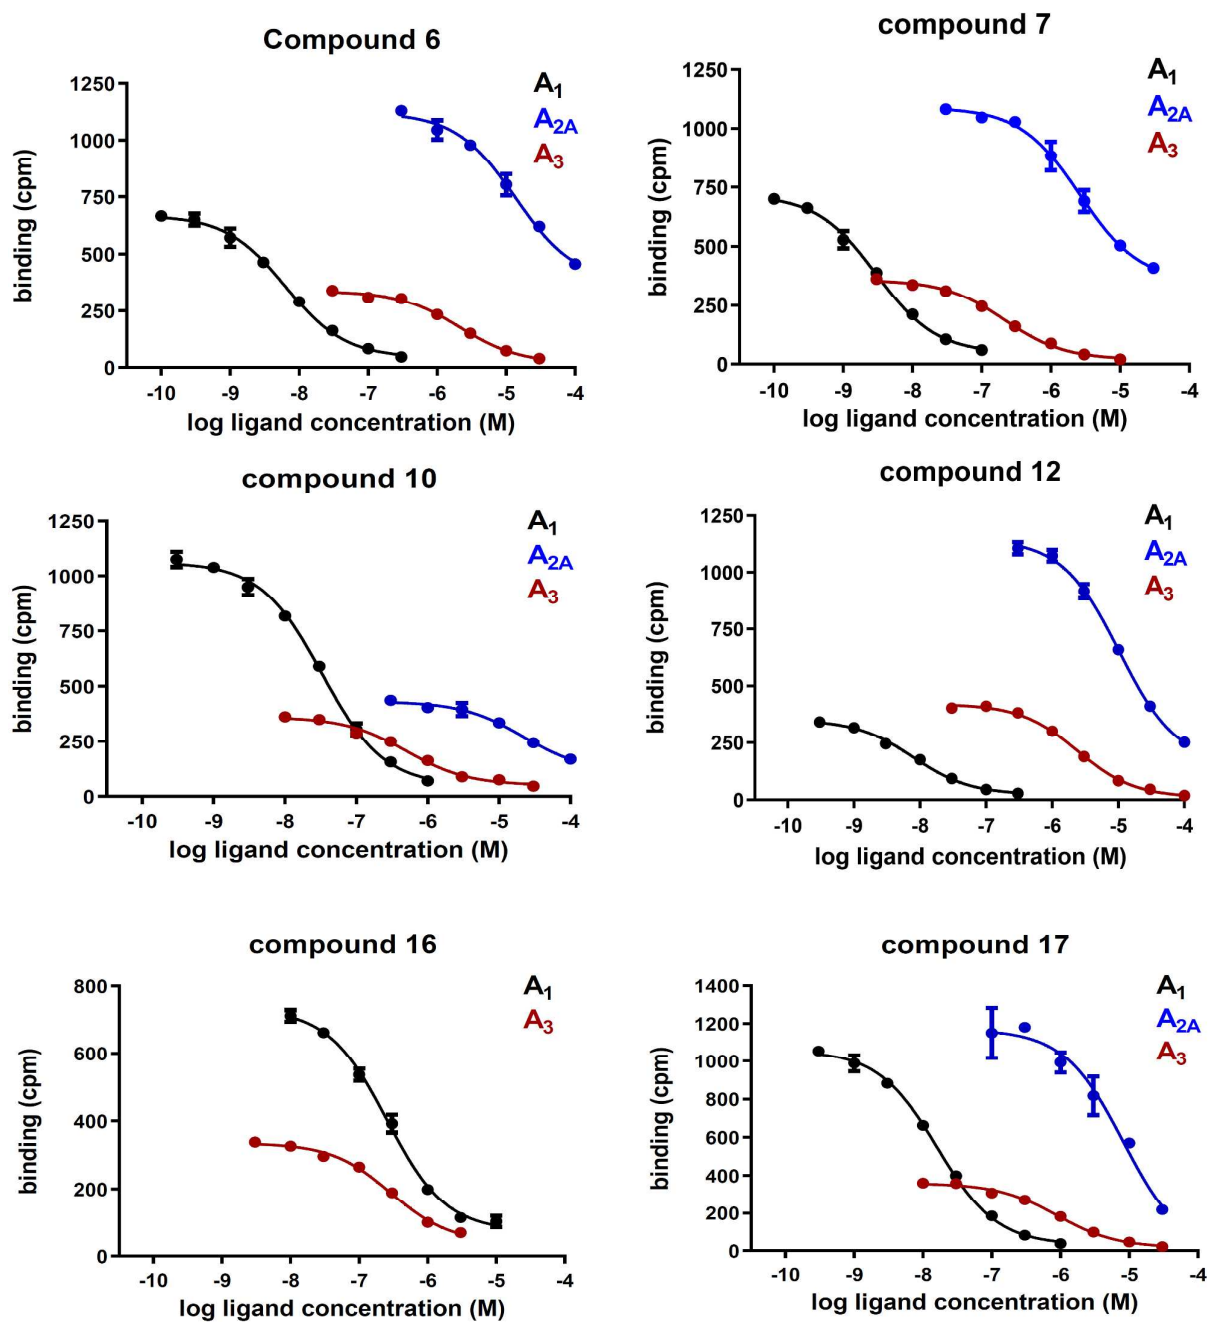

**Figure S1.** Representative binding curves at  $hA_1$ ,  $hA_{2A}$  and  $hA_3$  ARs for compounds 6, 7, 10, 12, 16 and 17.

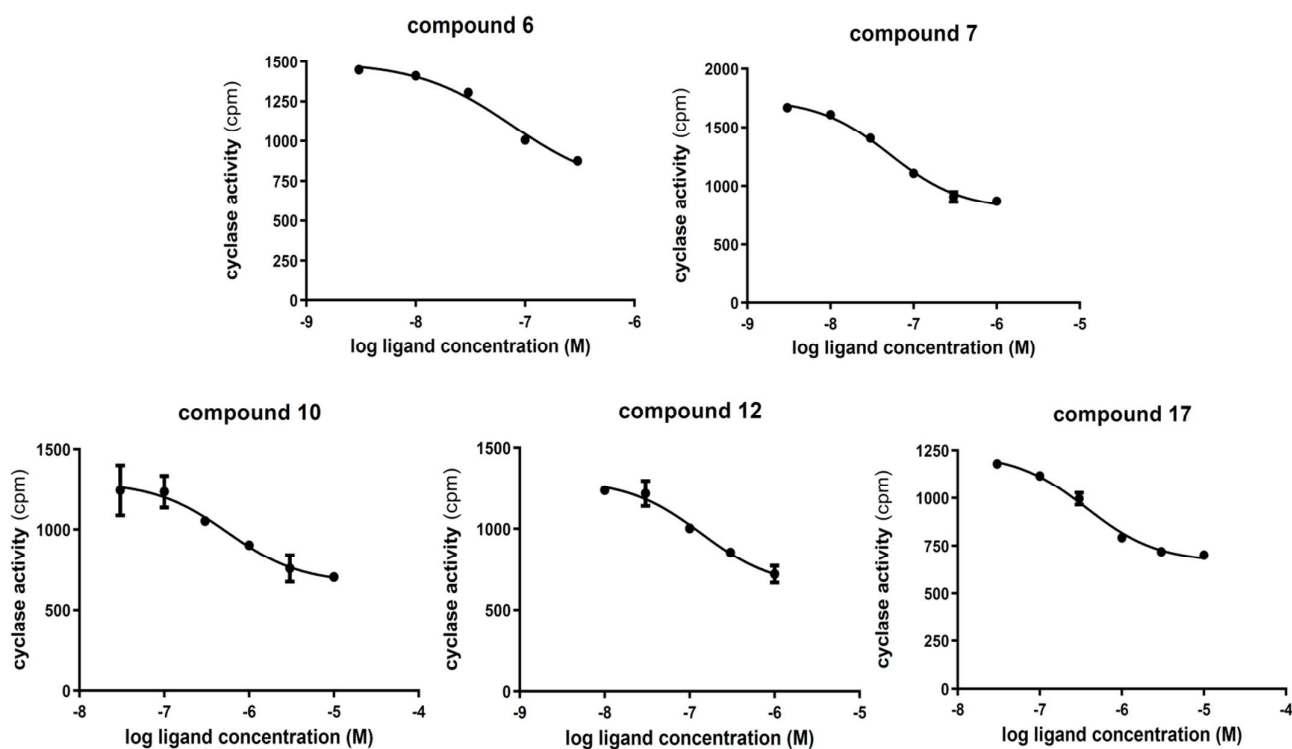

**Figure S2.** Effect of selected compounds on activity of adenylyl cyclase. **6**, **7**, **10**, **12**, and **17** mediate an inhibition of forskolin-stimulated adenylyl cyclase activity via  $hA_1ARs$ . They show the same inhibition as the full agonist CCPA (not shown).

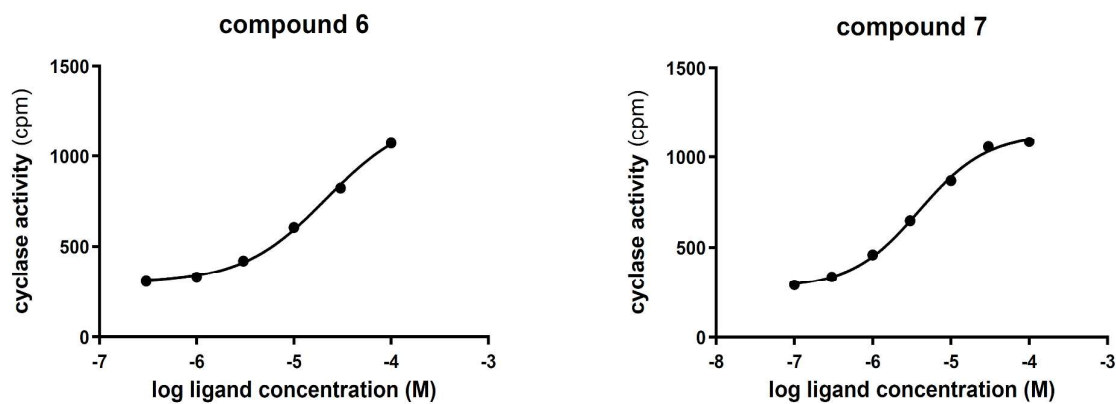

**Figure S3.** Effect of compounds **6** and **7** on activity of adenylyl cyclase at hA<sub>2B</sub>AR.

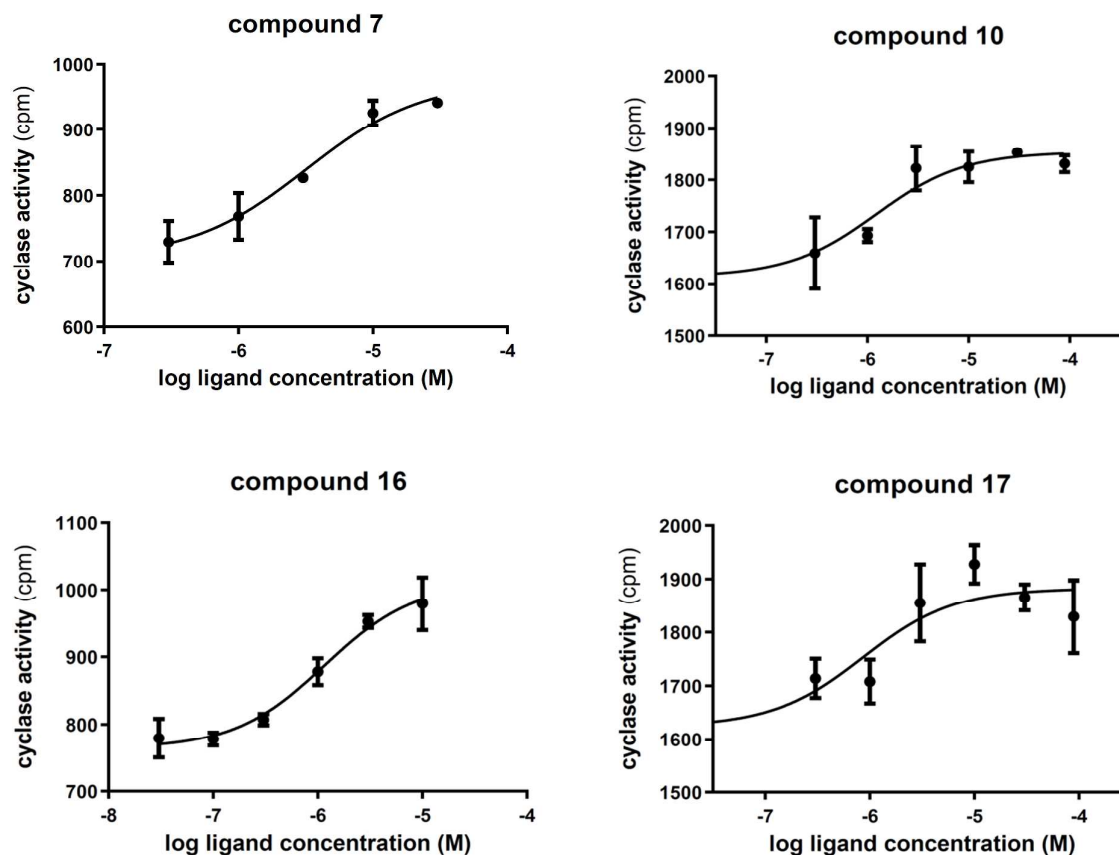

**Figure S4.** Effect of selected compounds on activity of adenylyl cyclase. **7, 10, 16,** and **17** present as antagonists at the hA<sub>3</sub>AR. They fully reverse the NECA-induced inhibition of forskolin-stimulated adenylyl cyclase activity.

## Cell culture

Chinese hamster ovary (CHO) cells stable transfected with hARs were grown in Dilbecco's modified Eagle's medium (DMEM) with nutrient mixture F12 supplemented with 10% fetal bovine serum (FBS), 100U/ml penicillin, 100 µg/mL streptomycin, 2.5 µg/ml Amphotericin B, 0.1 mg/ml Geneticine and 1 mM sodium pyruvate. They were cultured at 37°C in a humidified atmosphere of 5% CO<sub>2</sub>/95% air [1].

## Membrane preparation

Membranes for radioligand binding were prepared as described earlier [1]. In brief, after homogenization of CHO cells in ice-cold hypotonic buffer, 5 mM Tris/HCl, 2 mM EDTA, pH 7.4 and stably transfected with the human adenosine receptor subtypes, membranes were prepared in a two-step procedure. A first low-speed centrifugation (1,000 x g) was used to remove cell fragments and nuclei and was followed by a high-speed centrifugation (100,000 x g) of the supernatant in order to sediment a crude membrane fraction. The resulting membrane pellets were resuspended in the specific buffer used for the respective binding experiments (hA<sub>1</sub>ARs: 50 mM Tris/HCl buffer pH 7.4; hA<sub>2A</sub>ARs: 50 mM Tris/HCl, 50 mM MgCl<sub>2</sub> pH 7.4; hA<sub>3</sub>ARs: 50 mM Tris/HCl, 10 mM MgCl<sub>2</sub>, 1 mM EDTA, pH 8.25), frozen in liquid nitrogen at a protein concentration of 2-4 mg/ml and stored in aliquots at -80°C. Adenylyl cyclase activity was measured in a membrane fraction obtained in a simplified procedure with only one high-speed centrifugation of the homogenate. The resulting crude membrane pellet was resuspended in 50 mM Tris/HCl, pH 7.4 and used immediately for the cyclase assay.

## Radioligand Binding and Adenylyl Cyclase Assay.

In competition experiments, a fixed concentration of radioligand (1 nM [<sup>3</sup>H]CCPA, K<sub>D</sub> = 1.1 nM; 10 nM [<sup>3</sup>H]NECA, K<sub>D</sub> = 20 nM; 1 nM [<sup>3</sup>H]HEMADO, K<sub>D</sub> = 1.5 nM) was incubated in a 96-well plate with 10 µg of membrane protein and increasing concentrations of the tested compound. Non-specific binding was determined in the presence of 1 mM theophylline for hA<sub>1</sub> AR and 100 µM (*R*)-N<sup>6</sup>-phenyliso-propyladenosine (*R*-PIA) for both hA<sub>2A</sub> AR and hA<sub>3</sub> AR. Samples were incubated at rt, utilizing the 96-well microplate filtration system Millipore Multiscreen MAFC. After 3 h free radioligand was separated from bound radioligand by filtration through the filter bottom of the microplates. The filters were washed three times with 200 µl of ice-cold binding buffer for the respective receptor subtype and subsequently dried. After the addition of 20 µl of scintillation cocktail, the bound radioactivity was determined using a Wallac Microbeta Trilux scintillation

counter. Dissociation constants ( $K_i$  values) were calculated by non-linear curve fitting with Prism 5.0 programme (GraphPAD Software, San Diego, CA, USA). Each concentration was tested in duplicate in at least three independent experiments.  $K_i$  values are given as geometric means with 95% confidence intervals [1, 2, 4].

Due to the lack of a useful high-affinity radioligand for  $A_{2B}$  ARs, stimulation of adenylyl cyclase activity was measured to determine agonist potency ( $EC_{50}$  values) [1]. If only partial agonistic activity was observed, efficacy was compared to 100  $\mu$ M NECA as a full agonist. All values are given as geometric means with 95% confidence intervals ( $n \geq 3$ ). The functional activity at the  $hA_1$  and  $hA_3$  receptors was determined in adenylyl cyclase experiments. The inhibition of forskolin-stimulated adenylyl cyclase via  $hA_1$  and  $A_3$  receptors was measured as described in detail earlier [1,3]. As reference agonists (efficacy = 100%), CCPA [4] and NECA [3], respectively, were used. Compounds were considered to be  $A_3$  antagonists if they fully reversed (>85%) the NECA-mediated inhibition of adenylyl cyclase activity.

[1] Klotz, K.-N.; Hessling, J.; Hegler, J.; Owman, B.; Kull, B.; Fredholm, B. B.; Lohse, M. J. Comparative pharmacology of human adenosine receptor subtypes-characterization of stably transfected receptors in CHO cells. *Naunyn-Schmiedeberg's Arch. Pharmacol.* **1998**, 357, 1–9.

[2] Klotz, K.-N.; Kachler, S.; Falgner, N.; Volpini, R.; Dal Ben, D.; Lambertucci, C.; Mishra, R. C.; Vittori, S.; Cristalli, G. [ $^3$ H]HEMADO- a novel highly potent and selective radiolabeled agonist for  $A_3$  adenosine receptors. *Eur. J. Pharmacol.* **2007**, 556, 14–18.

[3] Klotz, K.-N.; Cristalli, G.; Grifantini, M.; Vittori, S.; Lohse, M. J. Photoaffinity labeling of  $A_1$ -adenosine receptors. *J. Biol. Chem.* **1985**, 260, 14659-14664.

[4] Lohse, M. J.; Klotz, K.-N.; Schwabe, U.; Cristalli, G.; Vittori, S.; Grifantini, M. 2-Chloro- $N^6$ -cyclopentyladenosine: a highly selective agonist at  $A_1$  adenosine receptors. *Naunyn-Schmiedeberg's Arch. Pharmacol.* **1988**, 337, 687-689.
